# Supplementary material for: Stabilization of anti-aromatic and strained five-membered rings with a transition metal
Source: Springer Nature journal article supplement (doi:10.1038/nchem.1690), 2013-06-21
Supplement: 41557_2013_BFnchem1690_MOESM1_ESM.mol [file 41557_2013_BFnchem1690_MOESM1_ESM.mol]

  ChemDraw06061307222D

 66 69  0  0  0  0  0  0  0  0999 V2000
    0.4401    0.4832    0.0000 C   0  0  0  0  0  0  0  0  0  0  0  0
   -0.3558    0.4816    0.0000 C   0  5  0  0  0  0  0  0  0  0  0  0
    0.3338   -0.6898    0.0000 C   0  0  0  0  0  0  0  0  0  0  0  0
    0.8372   -0.2090    0.0000 C   0  0  0  0  0  0  0  0  0  0  0  0
    1.1094    1.3029    0.0000 P   0  3  0  0  0  0  0  0  0  0  0  0
    1.6649   -0.2090    0.0000 O   0  0  0  0  0  0  0  0  0  0  0  0
   -0.1627   -1.1433    0.0000 C   0  0  0  0  0  0  0  0  0  0  0  0
    2.2435    0.7044    0.0000 C   0  0  0  0  0  0  0  0  0  0  0  0
    1.1802    2.3460    0.0000 C   0  0  0  0  0  0  0  0  0  0  0  0
    2.1508    1.7831    0.0000 C   0  0  0  0  0  0  0  0  0  0  0  0
    1.9567    2.6249    0.0000 C   0  0  0  0  0  0  0  0  0  0  0  0
    2.1033    3.4367    0.0000 C   0  0  0  0  0  0  0  0  0  0  0  0
    1.4736    3.9697    0.0000 C   0  0  0  0  0  0  0  0  0  0  0  0
    0.6971    3.6908    0.0000 C   0  0  0  0  0  0  0  0  0  0  0  0
    0.5505    2.8789    0.0000 C   0  0  0  0  0  0  0  0  0  0  0  0
    2.8351    1.3222    0.0000 C   0  0  0  0  0  0  0  0  0  0  0  0
    3.5763    1.6844    0.0000 C   0  0  0  0  0  0  0  0  0  0  0  0
    3.6333    2.5074    0.0000 C   0  0  0  0  0  0  0  0  0  0  0  0
    2.9490    2.9683    0.0000 C   0  0  0  0  0  0  0  0  0  0  0  0
    2.2078    2.6061    0.0000 C   0  0  0  0  0  0  0  0  0  0  0  0
    2.2011   -0.1195    0.0000 C   0  0  0  0  0  0  0  0  0  0  0  0
    2.8934   -0.5682    0.0000 C   0  0  0  0  0  0  0  0  0  0  0  0
    3.6282   -0.1929    0.0000 C   0  0  0  0  0  0  0  0  0  0  0  0
    3.6954    0.6289    0.0000 C   0  0  0  0  0  0  0  0  0  0  0  0
    3.0279    1.0756    0.0000 C   0  0  0  0  0  0  0  0  0  0  0  0
   -1.1934    1.0557    0.0000 P   0  0  0  0  0  0  0  0  0  0  0  0
   -2.0869    1.2605    0.0000 C   0  0  0  0  0  0  0  0  0  0  0  0
   -1.7221    2.1176    0.0000 C   0  0  0  0  0  0  0  0  0  0  0  0
   -0.7175    1.7036    0.0000 C   0  0  0  0  0  0  0  0  0  0  0  0
   -2.3297    2.0490    0.0000 C   0  0  0  0  0  0  0  0  0  0  0  0
   -3.1340    2.2330    0.0000 C   0  0  0  0  0  0  0  0  0  0  0  0
   -3.6954    1.6285    0.0000 C   0  0  0  0  0  0  0  0  0  0  0  0
   -3.4256    0.8493    0.0000 C   0  0  0  0  0  0  0  0  0  0  0  0
   -2.5945    0.6747    0.0000 C   0  0  0  0  0  0  0  0  0  0  0  0
   -1.2099    2.7644    0.0000 C   0  0  0  0  0  0  0  0  0  0  0  0
   -1.5138    3.5313    0.0000 C   0  0  0  0  0  0  0  0  0  0  0  0
   -2.3300    3.6515    0.0000 C   0  0  0  0  0  0  0  0  0  0  0  0
   -2.8422    3.0048    0.0000 C   0  0  0  0  0  0  0  0  0  0  0  0
   -2.5383    2.2379    0.0000 C   0  0  0  0  0  0  0  0  0  0  0  0
    0.1043    1.6305    0.0000 C   0  0  0  0  0  0  0  0  0  0  0  0
    0.5785    2.3056    0.0000 C   0  0  0  0  0  0  0  0  0  0  0  0
    0.2309    3.0538    0.0000 C   0  0  0  0  0  0  0  0  0  0  0  0
   -0.5909    3.1269    0.0000 C   0  0  0  0  0  0  0  0  0  0  0  0
   -1.0650    2.4518    0.0000 C   0  0  0  0  0  0  0  0  0  0  0  0
   -1.1934   -1.4947    0.0000 P   0  0  0  0  0  0  0  0  0  0  0  0
   -0.2641   -1.9072    0.0000 C   0  0  0  0  0  0  0  0  0  0  0  0
   -2.1227   -1.9072    0.0000 C   0  0  0  0  0  0  0  0  0  0  0  0
   -1.1934   -2.3197    0.0000 C   0  0  0  0  0  0  0  0  0  0  0  0
   -2.7896   -1.4215    0.0000 C   0  0  0  0  0  0  0  0  0  0  0  0
   -3.5437   -1.7562    0.0000 C   0  0  0  0  0  0  0  0  0  0  0  0
   -3.6309   -2.5766    0.0000 C   0  0  0  0  0  0  0  0  0  0  0  0
   -2.9640   -3.0623    0.0000 C   0  0  0  0  0  0  0  0  0  0  0  0
   -2.2099   -2.7276    0.0000 C   0  0  0  0  0  0  0  0  0  0  0  0
   -1.9079   -2.7322    0.0000 C   0  0  0  0  0  0  0  0  0  0  0  0
   -1.9079   -3.5572    0.0000 C   0  0  0  0  0  0  0  0  0  0  0  0
   -1.1934   -3.9697    0.0000 C   0  0  0  0  0  0  0  0  0  0  0  0
   -0.4789   -3.5572    0.0000 C   0  0  0  0  0  0  0  0  0  0  0  0
   -0.4789   -2.7322    0.0000 C   0  0  0  0  0  0  0  0  0  0  0  0
   -0.1769   -2.7276    0.0000 C   0  0  0  0  0  0  0  0  0  0  0  0
    0.5772   -3.0623    0.0000 C   0  0  0  0  0  0  0  0  0  0  0  0
    1.2441   -2.5766    0.0000 C   0  0  0  0  0  0  0  0  0  0  0  0
    1.1569   -1.7562    0.0000 C   0  0  0  0  0  0  0  0  0  0  0  0
    0.4028   -1.4215    0.0000 C   0  0  0  0  0  0  0  0  0  0  0  0
   -2.0002   -1.0049    0.0000 Cl  0  5  0  0  0  0  0  0  0  0  0  0
   -1.9514    0.5919    0.0000 Cl  0  5  0  0  0  0  0  0  0  0  0  0
   -1.1934   -0.2417    0.0000 Os  0  2  0  0  0  0  0  0  0  0  0  0
  1  2  2  0      
  3  4  1  0      
  4  1  1  0      
  1  5  1  0      
  4  6  1  0      
  3  7  3  0      
  5  8  1  0      
  5  9  1  0      
  5 10  1  0      
  9 11  2  0      
 11 12  1  0      
 12 13  2  0      
 13 14  1  0      
 14 15  2  0      
 15  9  1  0      
 10 16  2  0      
 16 17  1  0      
 17 18  2  0      
 18 19  1  0      
 19 20  2  0      
 20 10  1  0      
  8 21  2  0      
 21 22  1  0      
 22 23  2  0      
 23 24  1  0      
 24 25  2  0      
 25  8  1  0      
 26 27  1  0      
 26 28  1  0      
 26 29  1  0      
 27 30  2  0      
 30 31  1  0      
 31 32  2  0      
 32 33  1  0      
 33 34  2  0      
 34 27  1  0      
 28 35  2  0      
 35 36  1  0      
 36 37  2  0      
 37 38  1  0      
 38 39  2  0      
 39 28  1  0      
 29 40  2  0      
 40 41  1  0      
 41 42  2  0      
 42 43  1  0      
 43 44  2  0      
 44 29  1  0      
 45 46  1  0      
 45 47  1  0      
 45 48  1  0      
 47 49  2  0      
 49 50  1  0      
 50 51  2  0      
 51 52  1  0      
 52 53  2  0      
 53 47  1  0      
 48 54  2  0      
 54 55  1  0      
 55 56  2  0      
 56 57  1  0      
 57 58  2  0      
 58 48  1  0      
 46 59  2  0      
 59 60  1  0      
 60 61  2  0      
 61 62  1  0      
 62 63  2  0      
 63 46  1  0      
M  CHG  5   2  -1   5   1  64  -1  65  -1  66   2
M  END
