# Supplementary material for: Stabilization of anti-aromatic and strained five-membered rings with a transition metal
Source: Springer Nature journal article supplement (doi:10.1038/nchem.1690), 2013-06-21
Supplement: 41557_2013_BFnchem1690_MOESM6_ESM.cif [file 41557_2013_BFnchem1690_MOESM6_ESM.cif]

 
data_1 
 
_audit_creation_method            SHELXL-97 
_chemical_name_systematic 
; 
 ? 
; 
_chemical_name_common             ? 
_chemical_melting_point           ? 
_chemical_formula_moiety          'C63 H51 B Cl F4 O2 Os P3, C2H7Cl4BF4O' 
_chemical_formula_sum 
 'C65 H58 B2 Cl5 F8 O3 Os P3' 
_chemical_formula_weight          1521.09 
 
loop_ 
 _atom_type_symbol 
 _atom_type_description 
 _atom_type_scat_dispersion_real 
 _atom_type_scat_dispersion_imag 
 _atom_type_scat_source 
 'C'  'C'   0.0033   0.0016 
 'International Tables Vol C Tables 4.2.6.8 and 6.1.1.4' 
 'H'  'H'   0.0000   0.0000 
 'International Tables Vol C Tables 4.2.6.8 and 6.1.1.4' 
 'B'  'B'   0.0013   0.0007 
 'International Tables Vol C Tables 4.2.6.8 and 6.1.1.4' 
 'O'  'O'   0.0106   0.0060 
 'International Tables Vol C Tables 4.2.6.8 and 6.1.1.4' 
 'F'  'F'   0.0171   0.0103 
 'International Tables Vol C Tables 4.2.6.8 and 6.1.1.4' 
 'P'  'P'   0.1023   0.0942 
 'International Tables Vol C Tables 4.2.6.8 and 6.1.1.4' 
 'Cl'  'Cl'   0.1484   0.1585 
 'International Tables Vol C Tables 4.2.6.8 and 6.1.1.4' 
 'Os'  'Os'  -1.2165   7.6030 
 'International Tables Vol C Tables 4.2.6.8 and 6.1.1.4' 
 
_symmetry_cell_setting           triclinic 
_symmetry_space_group_name_H-M   'P -1' 
 
loop_ 
 _symmetry_equiv_pos_as_xyz 
 'x, y, z' 
 '-x, -y, -z' 
 
_cell_length_a                    13.8145(6) 
_cell_length_b                    15.1705(6) 
_cell_length_c                    17.3902(6) 
_cell_angle_alpha                 80.617(3) 
_cell_angle_beta                  81.263(3) 
_cell_angle_gamma                 63.058(4) 
_cell_volume                      3192.9(2) 
_cell_formula_units_Z             2 
_cell_measurement_temperature     173(2) 
_cell_measurement_reflns_used     9297 
_cell_measurement_theta_min       2.6492 
_cell_measurement_theta_max       29.1060 
 
_exptl_crystal_description        block 
_exptl_crystal_colour             orange 
_exptl_crystal_size_max           0.3 
_exptl_crystal_size_mid           0.2 
_exptl_crystal_size_min           0.05 
_exptl_crystal_density_meas       ? 
_exptl_crystal_density_diffrn     1.582 
_exptl_crystal_density_method     'not measured' 
_exptl_crystal_F_000              1520 
_exptl_absorpt_coefficient_mu     2.351 
_exptl_absorpt_correction_type    'multi-scan' 
_exptl_absorpt_correction_T_min   0.93211 
_exptl_absorpt_correction_T_max   1.00000 
_exptl_absorpt_process_details    
; 
CrysAlisPro, Oxford Diffraction Ltd., 
Version 1.171.33.46 (release 27-08-2009 CrysAlis171 .NET) 
(compiled Aug 27 2009,17:19:36) 
Empirical absorption correction using spherical harmonics, 
 implemented in SCALE3 ABSPACK scaling algorithm. 
; 
 
_exptl_special_details 
; 
 ? 
; 
 
_diffrn_ambient_temperature       173(2) 
_diffrn_radiation_wavelength      0.71073 
_diffrn_radiation_type            MoK\a 
_diffrn_radiation_source          'fine-focus sealed tube' 
_diffrn_radiation_monochromator   graphite 
_diffrn_measurement_device_type   ? 
_diffrn_measurement_method        ? 
_diffrn_detector_area_resol_mean  ? 
_diffrn_standards_number          ? 
_diffrn_standards_interval_count  ? 
_diffrn_standards_interval_time   ? 
_diffrn_standards_decay_%         ? 
_diffrn_reflns_number             41205 
_diffrn_reflns_av_R_equivalents   0.0801 
_diffrn_reflns_av_sigmaI/netI     0.1303 
_diffrn_reflns_limit_h_min        -15 
_diffrn_reflns_limit_h_max        16 
_diffrn_reflns_limit_k_min        -17 
_diffrn_reflns_limit_k_max        18 
_diffrn_reflns_limit_l_min        -20 
_diffrn_reflns_limit_l_max        20 
_diffrn_reflns_theta_min          2.66 
_diffrn_reflns_theta_max          25.00 
_reflns_number_total              11226 
_reflns_number_gt                 7800 
_reflns_threshold_expression      >2sigma(I) 
 
_computing_data_collection        ? 
_computing_cell_refinement        ? 
_computing_data_reduction         ? 
_computing_structure_solution     'SHELXS-97 (Sheldrick, 1990)' 
_computing_structure_refinement   'SHELXL-97 (Sheldrick, 1997)' 
_computing_molecular_graphics     ? 
_computing_publication_material   ? 
 
_refine_special_details 
; 
 Refinement of F^2^ against ALL reflections.  The weighted R-factor wR and 
 goodness of fit S are based on F^2^, conventional R-factors R are based 
 on F, with F set to zero for negative F^2^. The threshold expression of 
 F^2^ > 2sigma(F^2^) is used only for calculating R-factors(gt) etc. and is 
 not relevant to the choice of reflections for refinement.  R-factors based 
 on F^2^ are statistically about twice as large as those based on F, and R- 
 factors based on ALL data will be even larger. 
; 
 
_refine_ls_structure_factor_coef  Fsqd  
_refine_ls_matrix_type            full 
_refine_ls_weighting_scheme       calc  
_refine_ls_weighting_details 
 'calc w=1/[\s^2^(Fo^2^)+(0.0129P)^2^+0.0000P] where P=(Fo^2^+2Fc^2^)/3' 
_atom_sites_solution_primary      direct 
_atom_sites_solution_secondary    difmap 
_atom_sites_solution_hydrogens    geom 
_refine_ls_hydrogen_treatment     constr 
_refine_ls_extinction_method      none 
_refine_ls_extinction_coef        ? 
_refine_ls_number_reflns          11226 
_refine_ls_number_parameters      784 
_refine_ls_number_restraints      6 
_refine_ls_R_factor_all           0.0749 
_refine_ls_R_factor_gt            0.0456 
_refine_ls_wR_factor_ref          0.0726 
_refine_ls_wR_factor_gt           0.0697 
_refine_ls_goodness_of_fit_ref    0.997 
_refine_ls_restrained_S_all       0.998 
_refine_ls_shift/su_max           0.001 
_refine_ls_shift/su_mean          0.000 
 
loop_ 
 _atom_site_label 
 _atom_site_type_symbol 
 _atom_site_fract_x 
 _atom_site_fract_y 
 _atom_site_fract_z 
 _atom_site_U_iso_or_equiv 
 _atom_site_adp_type 
 _atom_site_occupancy 
 _atom_site_symmetry_multiplicity 
 _atom_site_calc_flag 
 _atom_site_refinement_flags 
 _atom_site_disorder_assembly 
 _atom_site_disorder_group 
Os1 Os 0.30728(2) -0.00704(2) 0.201787(15) 0.01882(7) Uani 1 1 d . . . 
P1 P 0.44394(14) -0.00848(14) 0.27344(9) 0.0236(4) Uani 1 1 d . . . 
P2 P 0.17745(13) 0.00287(13) 0.11828(9) 0.0231(4) Uani 1 1 d . . . 
P3 P 0.49957(14) -0.35427(13) 0.19848(9) 0.0252(4) Uani 1 1 d . . . 
Cl1 Cl 0.37190(13) 0.07808(12) 0.09066(8) 0.0278(4) Uani 1 1 d . . . 
O1 O 0.0674(4) 0.1961(4) 0.3924(3) 0.0541(14) Uani 1 1 d . . . 
O2 O 0.0699(4) 0.0625(4) 0.4707(2) 0.0431(13) Uani 1 1 d . . . 
C1 C 0.4104(4) -0.1432(4) 0.1705(3) 0.0191(15) Uani 1 1 d . . . 
H1A H 0.4557 -0.1493 0.1242 0.023 Uiso 1 1 calc R . . 
C2 C 0.4148(5) -0.2290(5) 0.2176(3) 0.0211(15) Uani 1 1 d . . . 
C3 C 0.3408(5) -0.2048(5) 0.2862(3) 0.0254(16) Uani 1 1 d . . . 
H3A H 0.3347 -0.2528 0.3247 0.030 Uiso 1 1 calc R . . 
C4 C 0.2804(5) -0.1064(5) 0.2904(3) 0.0256(17) Uani 1 1 d . . . 
C5 C 0.2058(5) -0.0630(6) 0.3547(4) 0.0316(18) Uani 1 1 d . . . 
H5A H 0.1889 -0.0998 0.3982 0.038 Uiso 1 1 calc R . . 
C6 C 0.1610(5) 0.0397(5) 0.3457(3) 0.0260(16) Uani 1 1 d . . . 
C7 C 0.2055(5) 0.0669(5) 0.2704(3) 0.0227(15) Uani 1 1 d U . . 
C8 C 0.0948(5) 0.1086(6) 0.4029(4) 0.0351(18) Uani 1 1 d . . . 
C9 C 0.0111(6) 0.1258(6) 0.5330(4) 0.063(3) Uani 1 1 d . . . 
H9A H 0.0026 0.0856 0.5798 0.095 Uiso 1 1 calc R . . 
H9B H -0.0594 0.1735 0.5176 0.095 Uiso 1 1 calc R . . 
H9C H 0.0513 0.1599 0.5426 0.095 Uiso 1 1 calc R . . 
C111 C 0.5821(5) -0.0995(5) 0.2497(4) 0.0244(16) Uani 1 1 d . . . 
C112 C 0.6548(5) -0.1597(5) 0.3049(4) 0.0378(19) Uani 1 1 d . . . 
H11A H 0.6338 -0.1522 0.3577 0.045 Uiso 1 1 calc R . . 
C113 C 0.7579(6) -0.2307(6) 0.2824(5) 0.048(2) Uani 1 1 d . . . 
H11B H 0.8042 -0.2719 0.3202 0.057 Uiso 1 1 calc R . . 
C114 C 0.7916(6) -0.2404(5) 0.2055(5) 0.048(2) Uani 1 1 d . . . 
H11C H 0.8613 -0.2875 0.1908 0.057 Uiso 1 1 calc R . . 
C115 C 0.7227(5) -0.1807(5) 0.1490(4) 0.0400(19) Uani 1 1 d . . . 
H11D H 0.7460 -0.1872 0.0963 0.048 Uiso 1 1 calc R . . 
C116 C 0.6197(5) -0.1117(5) 0.1710(4) 0.0352(18) Uani 1 1 d . . . 
H11E H 0.5737 -0.0720 0.1325 0.042 Uiso 1 1 calc R . . 
C121 C 0.4531(5) 0.1096(5) 0.2617(3) 0.0260(16) Uani 1 1 d . . . 
C122 C 0.5508(5) 0.1097(5) 0.2757(3) 0.0334(18) Uani 1 1 d . . . 
H12A H 0.6118 0.0501 0.2864 0.040 Uiso 1 1 calc R . . 
C123 C 0.5546(6) 0.1999(6) 0.2732(4) 0.042(2) Uani 1 1 d . . . 
H12B H 0.6187 0.2007 0.2827 0.050 Uiso 1 1 calc R . . 
C124 C 0.4660(7) 0.2869(6) 0.2571(4) 0.048(2) Uani 1 1 d . . . 
H12C H 0.4694 0.3469 0.2566 0.057 Uiso 1 1 calc R . . 
C125 C 0.3698(6) 0.2873(5) 0.2414(4) 0.0428(19) Uani 1 1 d . . . 
H12D H 0.3096 0.3471 0.2294 0.051 Uiso 1 1 calc R . . 
C126 C 0.3649(5) 0.1986(5) 0.2439(3) 0.0308(17) Uani 1 1 d . . . 
H12E H 0.3009 0.1986 0.2333 0.037 Uiso 1 1 calc R . . 
C131 C 0.4164(5) -0.0294(6) 0.3792(4) 0.0320(18) Uani 1 1 d . . . 
C132 C 0.4323(5) -0.1233(6) 0.4151(4) 0.042(2) Uani 1 1 d . . . 
H13A H 0.4677 -0.1776 0.3862 0.050 Uiso 1 1 calc R . . 
C133 C 0.3962(6) -0.1378(7) 0.4936(4) 0.056(3) Uani 1 1 d . . . 
H13B H 0.4070 -0.2009 0.5168 0.067 Uiso 1 1 calc R . . 
C134 C 0.3455(7) -0.0584(8) 0.5350(4) 0.064(3) Uani 1 1 d . . . 
H13C H 0.3191 -0.0669 0.5868 0.077 Uiso 1 1 calc R . . 
C135 C 0.3320(6) 0.0344(7) 0.5023(4) 0.061(3) Uani 1 1 d . . . 
H13D H 0.3000 0.0876 0.5323 0.073 Uiso 1 1 calc R . . 
C136 C 0.3669(6) 0.0486(6) 0.4230(4) 0.044(2) Uani 1 1 d . . . 
H13E H 0.3560 0.1119 0.4003 0.053 Uiso 1 1 calc R . . 
C211 C 0.0633(5) -0.0208(5) 0.1673(3) 0.0246(16) Uani 1 1 d . . . 
C212 C -0.0440(5) 0.0468(5) 0.1562(3) 0.0338(18) Uani 1 1 d . . . 
H21A H -0.0584 0.1058 0.1238 0.041 Uiso 1 1 calc R . . 
C213 C -0.1300(5) 0.0274(6) 0.1928(4) 0.043(2) Uani 1 1 d . . . 
H21B H -0.2015 0.0744 0.1866 0.052 Uiso 1 1 calc R . . 
C214 C -0.1093(6) -0.0610(6) 0.2382(4) 0.041(2) Uani 1 1 d . . . 
H21C H -0.1667 -0.0750 0.2616 0.050 Uiso 1 1 calc R . . 
C215 C -0.0039(5) -0.1286(5) 0.2488(3) 0.0358(19) Uani 1 1 d . . . 
H21D H 0.0106 -0.1887 0.2795 0.043 Uiso 1 1 calc R . . 
C216 C 0.0806(5) -0.1076(5) 0.2142(3) 0.0277(16) Uani 1 1 d . . . 
H21E H 0.1517 -0.1537 0.2229 0.033 Uiso 1 1 calc R . . 
C221 C 0.1093(5) 0.1246(5) 0.0643(3) 0.0229(15) Uani 1 1 d . . . 
C222 C 0.0773(5) 0.2094(5) 0.1003(3) 0.0272(16) Uani 1 1 d . . . 
H22A H 0.0996 0.2038 0.1494 0.033 Uiso 1 1 calc R . . 
C223 C 0.0134(5) 0.3016(5) 0.0653(4) 0.0359(18) Uani 1 1 d . . . 
H22B H -0.0092 0.3576 0.0913 0.043 Uiso 1 1 calc R . . 
C224 C -0.0177(5) 0.3115(5) -0.0097(4) 0.0373(18) Uani 1 1 d . . . 
H22C H -0.0597 0.3739 -0.0345 0.045 Uiso 1 1 calc R . . 
C225 C 0.0144(5) 0.2283(6) -0.0457(4) 0.0338(18) Uani 1 1 d . . . 
H22D H -0.0058 0.2346 -0.0957 0.041 Uiso 1 1 calc R . . 
C226 C 0.0765(5) 0.1344(5) -0.0098(3) 0.0289(16) Uani 1 1 d . . . 
H22E H 0.0962 0.0783 -0.0350 0.035 Uiso 1 1 calc R . . 
C231 C 0.2386(5) -0.0822(5) 0.0427(3) 0.0227(15) Uani 1 1 d . . . 
C232 C 0.3203(5) -0.0751(5) -0.0102(3) 0.0252(16) Uani 1 1 d . . . 
H23A H 0.3422 -0.0260 -0.0079 0.030 Uiso 1 1 calc R . . 
C233 C 0.3701(5) -0.1401(5) -0.0662(3) 0.0296(17) Uani 1 1 d . . . 
H23B H 0.4251 -0.1341 -0.1016 0.036 Uiso 1 1 calc R . . 
C234 C 0.3401(5) -0.2141(5) -0.0712(3) 0.0341(17) Uani 1 1 d . . . 
H23C H 0.3737 -0.2573 -0.1096 0.041 Uiso 1 1 calc R . . 
C235 C 0.2594(5) -0.2225(5) -0.0180(4) 0.0381(19) Uani 1 1 d . . . 
H23D H 0.2397 -0.2731 -0.0196 0.046 Uiso 1 1 calc R . . 
C236 C 0.2072(5) -0.1565(5) 0.0380(3) 0.0310(17) Uani 1 1 d . . . 
H23E H 0.1511 -0.1617 0.0725 0.037 Uiso 1 1 calc R . . 
C311 C 0.4204(5) -0.4057(5) 0.1638(3) 0.0223(15) Uani 1 1 d . . . 
C312 C 0.4709(5) -0.4788(5) 0.1149(4) 0.0338(17) Uani 1 1 d . . . 
H31A H 0.5450 -0.5018 0.0995 0.041 Uiso 1 1 calc R . . 
C313 C 0.4108(6) -0.5186(5) 0.0883(4) 0.0410(19) Uani 1 1 d . . . 
H31B H 0.4442 -0.5686 0.0552 0.049 Uiso 1 1 calc R . . 
C314 C 0.3019(6) -0.4832(5) 0.1117(4) 0.0363(19) Uani 1 1 d . . . 
H31C H 0.2612 -0.5092 0.0936 0.044 Uiso 1 1 calc R . . 
C315 C 0.2516(5) -0.4104(5) 0.1611(4) 0.0372(18) Uani 1 1 d . . . 
H31D H 0.1774 -0.3868 0.1763 0.045 Uiso 1 1 calc R . . 
C316 C 0.5241(6) -0.4979(5) 0.3252(4) 0.0406(19) Uani 1 1 d . . . 
H31E H 0.4779 -0.5136 0.3024 0.049 Uiso 1 1 calc R . . 
C317 C 0.3119(5) -0.3728(5) 0.1878(3) 0.0323(17) Uani 1 1 d . . . 
H31F H 0.2789 -0.3246 0.2225 0.039 Uiso 1 1 calc R . . 
C321 C 0.5530(5) -0.4246(5) 0.2892(3) 0.0254(15) Uani 1 1 d . . . 
C322 C 0.6180(5) -0.3988(5) 0.3262(4) 0.0405(19) Uani 1 1 d . . . 
H32A H 0.6350 -0.3472 0.3032 0.049 Uiso 1 1 calc R . . 
C323 C 0.6563(6) -0.4487(6) 0.3951(4) 0.055(2) Uani 1 1 d . . . 
H32B H 0.7017 -0.4324 0.4181 0.066 Uiso 1 1 calc R . . 
C324 C 0.6295(7) -0.5227(7) 0.4317(4) 0.067(3) Uani 1 1 d . . . 
H32C H 0.6548 -0.5551 0.4799 0.081 Uiso 1 1 calc R . . 
C325 C 0.5648(6) -0.5484(6) 0.3963(4) 0.062(2) Uani 1 1 d . . . 
H32D H 0.5480 -0.6000 0.4200 0.075 Uiso 1 1 calc R . . 
C331 C 0.6055(5) -0.3614(5) 0.1245(3) 0.0259(16) Uani 1 1 d . . . 
C332 C 0.7146(5) -0.4124(5) 0.1350(4) 0.0340(18) Uani 1 1 d . . . 
H33A H 0.7367 -0.4477 0.1831 0.041 Uiso 1 1 calc R . . 
C333 C 0.7925(5) -0.4115(5) 0.0742(4) 0.044(2) Uani 1 1 d . . . 
H33B H 0.8663 -0.4451 0.0819 0.053 Uiso 1 1 calc R . . 
C334 C 0.7596(6) -0.3608(5) 0.0026(4) 0.0404(19) Uani 1 1 d . . . 
H33C H 0.8115 -0.3605 -0.0382 0.048 Uiso 1 1 calc R . . 
C335 C 0.6522(6) -0.3110(5) -0.0089(4) 0.0351(18) Uani 1 1 d . . . 
H33D H 0.6313 -0.2773 -0.0577 0.042 Uiso 1 1 calc R . . 
C336 C 0.5733(5) -0.3097(5) 0.0509(3) 0.0281(16) Uani 1 1 d . . . 
H33E H 0.4998 -0.2750 0.0425 0.034 Uiso 1 1 calc R . . 
B1 B 0.0267(8) 0.4636(8) 0.2273(6) 0.054(3) Uani 1 1 d . . . 
F1 F -0.0024(6) 0.4991(5) 0.3057(3) 0.147(3) Uani 1 1 d . . . 
F2 F 0.1131(5) 0.3813(6) 0.2263(5) 0.171(3) Uani 1 1 d . . . 
F3 F 0.0379(4) 0.5334(5) 0.1770(3) 0.103(2) Uani 1 1 d . . . 
F4 F -0.0588(4) 0.4458(4) 0.2171(2) 0.0921(18) Uani 1 1 d . . . 
B2 B -0.1716(11) 0.3983(12) 0.6177(7) 0.084(4) Uani 1 1 d . . . 
F5 F -0.1579(4) 0.4302(4) 0.5401(3) 0.1015(19) Uani 1 1 d . . . 
F6 F -0.1864(6) 0.3214(5) 0.6287(4) 0.141(3) Uani 1 1 d . . . 
F7 F -0.2713(5) 0.4786(5) 0.6449(4) 0.137(3) Uani 1 1 d . . . 
F8 F -0.0927(6) 0.3925(5) 0.6571(3) 0.133(3) Uani 1 1 d . . . 
O1W O -0.0668(5) 0.3910(5) 0.4004(3) 0.118(2) Uani 1 1 d . . . 
H1WA H -0.0449 0.4274 0.3673 0.142 Uiso 1 1 d R . . 
H1WB H -0.0881 0.4173 0.4432 0.142 Uiso 1 1 d R . . 
H1WC H -0.0151 0.3330 0.4075 0.142 Uiso 1 1 d R . . 
C1S C 0.1581(7) -0.2819(7) -0.2859(4) 0.083(3) Uani 1 1 d . . . 
H1SA H 0.1730 -0.3407 -0.3099 0.099 Uiso 1 1 calc R . . 
H1SB H 0.0820 -0.2533 -0.2658 0.099 Uiso 1 1 calc R . . 
Cl1A Cl 0.1799(2) -0.1970(2) -0.35650(13) 0.0893(9) Uani 1 1 d . . . 
Cl1B Cl 0.23919(17) -0.31721(17) -0.20766(12) 0.0675(6) Uani 1 1 d . . . 
C2S C 0.2159(6) 0.3352(7) 0.4335(5) 0.088(3) Uani 1 1 d . . . 
H2SA H 0.2036 0.3990 0.4043 0.105 Uiso 1 1 calc R . . 
H2SB H 0.2070 0.2946 0.4001 0.105 Uiso 1 1 calc R . . 
Cl2A Cl 0.1218(2) 0.3518(3) 0.52078(17) 0.1334(12) Uani 1 1 d . . . 
Cl2B Cl 0.3520(2) 0.2735(2) 0.46796(15) 0.1043(9) Uani 1 1 d . . . 
 
loop_ 
 _atom_site_aniso_label 
 _atom_site_aniso_U_11 
 _atom_site_aniso_U_22 
 _atom_site_aniso_U_33 
 _atom_site_aniso_U_23 
 _atom_site_aniso_U_13 
 _atom_site_aniso_U_12 
Os1 0.02368(14) 0.01962(16) 0.01737(14) -0.00129(11) -0.00213(10) -0.01331(12) 
P1 0.0303(10) 0.0275(12) 0.0188(10) -0.0004(8) -0.0036(8) -0.0180(10) 
P2 0.0259(10) 0.0259(12) 0.0217(10) -0.0039(9) -0.0010(8) -0.0150(9) 
P3 0.0314(10) 0.0233(12) 0.0243(10) -0.0020(9) -0.0025(8) -0.0152(9) 
Cl1 0.0380(10) 0.0299(11) 0.0236(9) 0.0024(8) -0.0030(8) -0.0237(9) 
O1 0.070(4) 0.033(4) 0.056(4) -0.024(3) 0.020(3) -0.021(3) 
O2 0.057(3) 0.055(4) 0.028(3) -0.016(3) 0.016(2) -0.036(3) 
C1 0.019(3) 0.027(4) 0.015(3) -0.001(3) -0.002(3) -0.013(3) 
C2 0.027(4) 0.026(4) 0.013(3) -0.003(3) -0.003(3) -0.014(3) 
C3 0.029(4) 0.028(5) 0.026(4) 0.002(3) -0.005(3) -0.018(4) 
C4 0.025(4) 0.036(5) 0.024(4) -0.006(4) 0.000(3) -0.020(4) 
C5 0.023(4) 0.050(6) 0.026(4) -0.003(4) -0.003(3) -0.020(4) 
C6 0.025(4) 0.027(5) 0.028(4) -0.008(4) -0.003(3) -0.011(4) 
C7 0.020(2) 0.022(3) 0.031(3) 0.003(2) -0.008(2) -0.014(2) 
C8 0.028(4) 0.038(6) 0.041(5) -0.011(4) 0.002(3) -0.015(4) 
C9 0.082(6) 0.086(8) 0.036(5) -0.035(5) 0.032(4) -0.052(6) 
C111 0.030(4) 0.021(4) 0.030(4) 0.005(3) -0.007(3) -0.019(3) 
C112 0.036(4) 0.043(5) 0.042(5) 0.004(4) -0.005(4) -0.027(4) 
C113 0.032(5) 0.039(6) 0.068(6) 0.012(5) -0.013(4) -0.015(4) 
C114 0.027(4) 0.024(5) 0.091(7) -0.001(5) -0.006(5) -0.012(4) 
C115 0.033(4) 0.033(5) 0.058(5) -0.005(4) 0.009(4) -0.021(4) 
C116 0.027(4) 0.031(5) 0.055(5) 0.006(4) -0.009(4) -0.022(4) 
C121 0.037(4) 0.038(5) 0.016(4) -0.007(3) -0.002(3) -0.026(4) 
C122 0.040(4) 0.043(5) 0.026(4) -0.004(4) -0.003(3) -0.026(4) 
C123 0.059(5) 0.055(6) 0.033(4) -0.005(4) -0.004(4) -0.043(5) 
C124 0.088(6) 0.047(6) 0.036(5) 0.002(4) -0.010(4) -0.055(6) 
C125 0.065(5) 0.023(5) 0.041(5) -0.003(4) -0.011(4) -0.018(4) 
C126 0.041(4) 0.032(5) 0.028(4) -0.001(4) -0.007(3) -0.022(4) 
C131 0.039(4) 0.048(5) 0.026(4) 0.002(4) -0.008(3) -0.034(4) 
C132 0.043(5) 0.059(6) 0.032(4) 0.009(4) -0.013(4) -0.032(5) 
C133 0.067(6) 0.078(8) 0.034(5) 0.024(5) -0.018(4) -0.048(6) 
C134 0.085(7) 0.105(9) 0.025(5) 0.011(6) -0.008(5) -0.067(7) 
C135 0.075(6) 0.103(9) 0.033(5) -0.021(5) 0.000(4) -0.060(6) 
C136 0.061(5) 0.072(7) 0.021(4) -0.006(4) -0.003(4) -0.048(5) 
C211 0.033(4) 0.027(4) 0.021(4) -0.008(3) -0.003(3) -0.017(4) 
C212 0.036(4) 0.030(5) 0.036(4) 0.007(4) -0.009(3) -0.017(4) 
C213 0.022(4) 0.048(6) 0.059(5) -0.006(4) 0.007(4) -0.018(4) 
C214 0.037(5) 0.058(6) 0.040(5) -0.012(4) 0.012(4) -0.033(5) 
C215 0.048(5) 0.042(5) 0.030(4) -0.002(4) -0.001(4) -0.032(5) 
C216 0.029(4) 0.030(5) 0.028(4) -0.008(3) -0.001(3) -0.016(4) 
C221 0.026(4) 0.029(4) 0.019(4) -0.001(3) 0.000(3) -0.017(3) 
C222 0.032(4) 0.028(5) 0.022(4) 0.000(3) -0.002(3) -0.015(4) 
C223 0.043(5) 0.027(5) 0.040(5) -0.004(4) -0.001(4) -0.018(4) 
C224 0.035(4) 0.028(5) 0.043(5) 0.010(4) -0.003(4) -0.014(4) 
C225 0.035(4) 0.042(5) 0.022(4) 0.006(4) -0.010(3) -0.016(4) 
C226 0.036(4) 0.028(5) 0.022(4) -0.001(3) 0.000(3) -0.015(4) 
C231 0.031(4) 0.019(4) 0.019(4) -0.003(3) -0.005(3) -0.010(3) 
C232 0.030(4) 0.039(5) 0.016(4) -0.006(3) -0.002(3) -0.022(4) 
C233 0.032(4) 0.048(5) 0.015(4) -0.007(3) 0.002(3) -0.024(4) 
C234 0.039(4) 0.034(5) 0.020(4) -0.013(3) 0.000(3) -0.004(4) 
C235 0.062(5) 0.041(5) 0.027(4) -0.014(4) 0.003(4) -0.035(4) 
C236 0.037(4) 0.040(5) 0.029(4) -0.007(4) 0.004(3) -0.028(4) 
C311 0.037(4) 0.019(4) 0.017(4) -0.001(3) -0.004(3) -0.017(4) 
C312 0.036(4) 0.031(5) 0.038(4) -0.007(4) 0.003(3) -0.020(4) 
C313 0.054(5) 0.041(5) 0.038(4) -0.003(4) -0.002(4) -0.030(5) 
C314 0.044(5) 0.035(5) 0.044(5) 0.001(4) -0.019(4) -0.027(4) 
C315 0.030(4) 0.032(5) 0.053(5) 0.001(4) -0.007(4) -0.018(4) 
C316 0.060(5) 0.041(5) 0.028(4) -0.005(4) -0.001(4) -0.029(5) 
C317 0.035(4) 0.032(5) 0.038(4) -0.010(4) -0.001(3) -0.021(4) 
C321 0.030(4) 0.019(4) 0.025(4) -0.009(3) -0.001(3) -0.007(3) 
C322 0.049(5) 0.041(5) 0.041(5) -0.010(4) -0.005(4) -0.026(4) 
C323 0.052(5) 0.066(7) 0.045(5) -0.004(5) -0.025(4) -0.018(5) 
C324 0.083(7) 0.072(8) 0.035(5) 0.007(5) -0.026(5) -0.022(6) 
C325 0.091(7) 0.043(6) 0.045(5) 0.020(5) -0.012(5) -0.029(6) 
C331 0.034(4) 0.022(4) 0.027(4) -0.005(3) 0.002(3) -0.017(4) 
C332 0.041(5) 0.033(5) 0.033(4) -0.004(4) 0.002(4) -0.021(4) 
C333 0.033(4) 0.040(5) 0.059(5) -0.012(4) 0.003(4) -0.016(4) 
C334 0.053(5) 0.036(5) 0.041(5) -0.013(4) 0.013(4) -0.030(5) 
C335 0.052(5) 0.030(5) 0.032(4) -0.005(4) -0.002(4) -0.025(4) 
C336 0.034(4) 0.025(4) 0.029(4) -0.003(3) -0.001(3) -0.017(4) 
B1 0.052(7) 0.049(8) 0.052(7) 0.001(6) -0.020(5) -0.013(6) 
F1 0.239(8) 0.171(8) 0.086(5) -0.016(5) -0.007(5) -0.139(7) 
F2 0.083(5) 0.100(6) 0.263(9) -0.031(6) -0.015(5) 0.022(5) 
F3 0.110(5) 0.137(6) 0.083(4) 0.007(4) -0.007(3) -0.080(5) 
F4 0.085(4) 0.148(6) 0.073(3) -0.021(3) -0.012(3) -0.073(4) 
B2 0.098(10) 0.136(14) 0.064(9) -0.026(8) 0.032(7) -0.099(11) 
F5 0.105(4) 0.139(6) 0.047(3) 0.008(3) 0.004(3) -0.051(4) 
F6 0.184(7) 0.109(6) 0.159(6) -0.045(5) 0.063(5) -0.104(6) 
F7 0.116(5) 0.108(6) 0.134(5) -0.003(5) 0.046(4) -0.025(5) 
F8 0.188(7) 0.138(7) 0.106(5) 0.022(4) -0.060(5) -0.096(6) 
O1W 0.156(7) 0.083(6) 0.084(5) -0.022(4) 0.020(4) -0.029(5) 
C1S 0.077(7) 0.127(10) 0.067(6) -0.011(6) -0.009(5) -0.065(7) 
Cl1A 0.0989(19) 0.113(2) 0.0777(17) 0.0086(16) -0.0231(14) -0.0671(19) 
Cl1B 0.0704(15) 0.0688(18) 0.0723(15) -0.0129(13) -0.0093(12) -0.0358(14) 
C2S 0.053(6) 0.117(10) 0.099(7) -0.041(7) 0.004(5) -0.036(6) 
Cl2A 0.105(2) 0.174(4) 0.127(2) -0.021(2) -0.028(2) -0.059(3) 
Cl2B 0.099(2) 0.106(3) 0.116(2) -0.0278(19) -0.0263(17) -0.0427(19) 
 
_geom_special_details 
; 
 All esds (except the esd in the dihedral angle between two l.s. planes) 
 are estimated using the full covariance matrix.  The cell esds are taken 
 into account individually in the estimation of esds in distances, angles 
 and torsion angles; correlations between esds in cell parameters are only 
 used when they are defined by crystal symmetry.  An approximate (isotropic) 
 treatment of cell esds is used for estimating esds involving l.s. planes. 
; 
 
loop_ 
 _geom_bond_atom_site_label_1 
 _geom_bond_atom_site_label_2 
 _geom_bond_distance 
 _geom_bond_site_symmetry_2 
 _geom_bond_publ_flag 
Os1 C7 1.777(6) . ? 
Os1 C1 2.015(6) . ? 
Os1 C4 2.089(6) . ? 
Os1 P1 2.4053(15) . ? 
Os1 P2 2.4134(15) . ? 
Os1 Cl1 2.4302(14) . ? 
P1 C111 1.810(7) . ? 
P1 C131 1.826(6) . ? 
P1 C121 1.829(6) . ? 
P2 C221 1.818(6) . ? 
P2 C231 1.826(6) . ? 
P2 C211 1.829(6) . ? 
P3 C331 1.772(6) . ? 
P3 C2 1.779(7) . ? 
P3 C321 1.806(6) . ? 
P3 C311 1.816(5) . ? 
O1 C8 1.195(8) . ? 
O2 C8 1.350(7) . ? 
O2 C9 1.457(8) . ? 
C1 C2 1.401(7) . ? 
C2 C3 1.427(8) . ? 
C3 C4 1.349(9) . ? 
C4 C5 1.421(8) . ? 
C5 C6 1.382(9) . ? 
C6 C7 1.439(7) . ? 
C6 C8 1.455(9) . ? 
C111 C112 1.393(8) . ? 
C111 C116 1.399(8) . ? 
C112 C113 1.385(9) . ? 
C113 C114 1.356(9) . ? 
C114 C115 1.380(8) . ? 
C115 C116 1.371(9) . ? 
C121 C126 1.375(8) . ? 
C121 C122 1.407(7) . ? 
C122 C123 1.388(9) . ? 
C123 C124 1.356(9) . ? 
C124 C125 1.394(8) . ? 
C125 C126 1.372(8) . ? 
C131 C136 1.360(9) . ? 
C131 C132 1.391(9) . ? 
C132 C133 1.398(8) . ? 
C133 C134 1.351(11) . ? 
C134 C135 1.368(11) . ? 
C135 C136 1.405(8) . ? 
C211 C216 1.372(8) . ? 
C211 C212 1.390(8) . ? 
C212 C213 1.389(7) . ? 
C213 C214 1.371(9) . ? 
C214 C215 1.369(9) . ? 
C215 C216 1.373(7) . ? 
C221 C222 1.380(8) . ? 
C221 C226 1.393(7) . ? 
C222 C223 1.369(8) . ? 
C223 C224 1.399(8) . ? 
C224 C225 1.359(9) . ? 
C225 C226 1.386(8) . ? 
C231 C232 1.376(7) . ? 
C231 C236 1.396(7) . ? 
C232 C233 1.376(8) . ? 
C233 C234 1.379(8) . ? 
C234 C235 1.375(8) . ? 
C235 C236 1.386(8) . ? 
C311 C312 1.365(8) . ? 
C311 C317 1.368(8) . ? 
C312 C313 1.389(7) . ? 
C313 C314 1.367(8) . ? 
C314 C315 1.370(9) . ? 
C315 C317 1.367(7) . ? 
C316 C321 1.374(8) . ? 
C316 C325 1.394(8) . ? 
C321 C322 1.396(7) . ? 
C322 C323 1.350(8) . ? 
C323 C324 1.369(10) . ? 
C324 C325 1.376(9) . ? 
C331 C332 1.373(8) . ? 
C331 C336 1.407(7) . ? 
C332 C333 1.392(8) . ? 
C333 C334 1.375(8) . ? 
C334 C335 1.356(8) . ? 
C335 C336 1.382(8) . ? 
B1 F2 1.278(11) . ? 
B1 F3 1.311(10) . ? 
B1 F4 1.366(9) . ? 
B1 F1 1.478(11) . ? 
B2 F6 1.253(12) . ? 
B2 F8 1.337(11) . ? 
B2 F5 1.373(11) . ? 
B2 F7 1.441(15) . ? 
C1S Cl1A 1.725(8) . ? 
C1S Cl1B 1.754(7) . ? 
C2S Cl2A 1.812(8) . ? 
C2S Cl2B 1.826(8) . ? 
 
loop_ 
 _geom_angle_atom_site_label_1 
 _geom_angle_atom_site_label_2 
 _geom_angle_atom_site_label_3 
 _geom_angle 
 _geom_angle_site_symmetry_1 
 _geom_angle_site_symmetry_3 
 _geom_angle_publ_flag 
C7 Os1 C1 148.6(2) . . ? 
C7 Os1 C4 73.8(3) . . ? 
C1 Os1 C4 74.9(2) . . ? 
C7 Os1 P1 88.94(16) . . ? 
C1 Os1 P1 90.34(14) . . ? 
C4 Os1 P1 89.69(15) . . ? 
C7 Os1 P2 94.00(16) . . ? 
C1 Os1 P2 89.88(14) . . ? 
C4 Os1 P2 96.18(15) . . ? 
P1 Os1 P2 173.97(6) . . ? 
C7 Os1 Cl1 117.76(19) . . ? 
C1 Os1 Cl1 93.53(16) . . ? 
C4 Os1 Cl1 168.1(2) . . ? 
P1 Os1 Cl1 87.76(5) . . ? 
P2 Os1 Cl1 86.21(5) . . ? 
C111 P1 C131 106.2(3) . . ? 
C111 P1 C121 104.4(3) . . ? 
C131 P1 C121 102.5(3) . . ? 
C111 P1 Os1 115.6(2) . . ? 
C131 P1 Os1 112.73(18) . . ? 
C121 P1 Os1 114.2(2) . . ? 
C221 P2 C231 104.2(3) . . ? 
C221 P2 C211 102.7(3) . . ? 
C231 P2 C211 105.3(3) . . ? 
C221 P2 Os1 113.75(18) . . ? 
C231 P2 Os1 113.43(18) . . ? 
C211 P2 Os1 116.08(19) . . ? 
C331 P3 C2 111.1(3) . . ? 
C331 P3 C321 111.5(3) . . ? 
C2 P3 C321 107.7(3) . . ? 
C331 P3 C311 107.1(3) . . ? 
C2 P3 C311 110.1(3) . . ? 
C321 P3 C311 109.3(3) . . ? 
C8 O2 C9 115.6(6) . . ? 
C2 C1 Os1 120.7(4) . . ? 
C1 C2 C3 111.4(6) . . ? 
C1 C2 P3 126.6(5) . . ? 
C3 C2 P3 121.9(5) . . ? 
C4 C3 C2 114.3(6) . . ? 
C3 C4 C5 125.3(6) . . ? 
C3 C4 Os1 118.6(5) . . ? 
C5 C4 Os1 115.8(5) . . ? 
C6 C5 C4 112.9(6) . . ? 
C5 C6 C7 106.1(6) . . ? 
C5 C6 C8 128.6(6) . . ? 
C7 C6 C8 124.8(6) . . ? 
C6 C7 Os1 131.2(5) . . ? 
O1 C8 O2 123.2(7) . . ? 
O1 C8 C6 124.2(6) . . ? 
O2 C8 C6 112.6(6) . . ? 
C112 C111 C116 116.8(6) . . ? 
C112 C111 P1 124.4(5) . . ? 
C116 C111 P1 118.8(5) . . ? 
C113 C112 C111 121.1(7) . . ? 
C114 C113 C112 120.4(7) . . ? 
C113 C114 C115 120.2(7) . . ? 
C116 C115 C114 119.7(7) . . ? 
C115 C116 C111 121.7(6) . . ? 
C126 C121 C122 119.4(6) . . ? 
C126 C121 P1 121.5(4) . . ? 
C122 C121 P1 119.1(5) . . ? 
C123 C122 C121 119.0(7) . . ? 
C124 C123 C122 120.7(6) . . ? 
C123 C124 C125 120.5(7) . . ? 
C126 C125 C124 119.3(7) . . ? 
C125 C126 C121 121.1(6) . . ? 
C136 C131 C132 118.3(6) . . ? 
C136 C131 P1 120.5(6) . . ? 
C132 C131 P1 120.7(6) . . ? 
C131 C132 C133 121.5(8) . . ? 
C134 C133 C132 118.7(8) . . ? 
C133 C134 C135 121.3(8) . . ? 
C134 C135 C136 119.6(8) . . ? 
C131 C136 C135 120.6(8) . . ? 
C216 C211 C212 117.5(5) . . ? 
C216 C211 P2 121.2(5) . . ? 
C212 C211 P2 121.3(5) . . ? 
C213 C212 C211 120.8(6) . . ? 
C214 C213 C212 120.0(6) . . ? 
C215 C214 C213 119.6(6) . . ? 
C214 C215 C216 120.0(6) . . ? 
C211 C216 C215 122.1(6) . . ? 
C222 C221 C226 118.6(6) . . ? 
C222 C221 P2 119.9(4) . . ? 
C226 C221 P2 121.0(5) . . ? 
C223 C222 C221 121.5(6) . . ? 
C222 C223 C224 119.8(6) . . ? 
C225 C224 C223 118.9(7) . . ? 
C224 C225 C226 121.6(6) . . ? 
C225 C226 C221 119.6(6) . . ? 
C232 C231 C236 118.6(6) . . ? 
C232 C231 P2 119.3(4) . . ? 
C236 C231 P2 122.0(5) . . ? 
C233 C232 C231 120.6(6) . . ? 
C232 C233 C234 121.3(6) . . ? 
C235 C234 C233 118.5(6) . . ? 
C234 C235 C236 120.8(6) . . ? 
C235 C236 C231 120.1(5) . . ? 
C312 C311 C317 120.6(5) . . ? 
C312 C311 P3 119.3(5) . . ? 
C317 C311 P3 120.1(5) . . ? 
C311 C312 C313 119.5(6) . . ? 
C314 C313 C312 119.0(7) . . ? 
C313 C314 C315 121.3(6) . . ? 
C317 C315 C314 119.1(6) . . ? 
C321 C316 C325 119.1(6) . . ? 
C315 C317 C311 120.4(7) . . ? 
C316 C321 C322 119.5(6) . . ? 
C316 C321 P3 121.0(5) . . ? 
C322 C321 P3 119.3(5) . . ? 
C323 C322 C321 120.2(6) . . ? 
C322 C323 C324 121.3(7) . . ? 
C323 C324 C325 119.1(7) . . ? 
C324 C325 C316 120.6(7) . . ? 
C332 C331 C336 119.1(5) . . ? 
C332 C331 P3 124.4(5) . . ? 
C336 C331 P3 116.5(5) . . ? 
C331 C332 C333 120.6(6) . . ? 
C334 C333 C332 119.6(6) . . ? 
C335 C334 C333 120.5(6) . . ? 
C334 C335 C336 120.9(6) . . ? 
C335 C336 C331 119.3(6) . . ? 
F2 B1 F3 111.7(10) . . ? 
F2 B1 F4 108.0(9) . . ? 
F3 B1 F4 114.4(7) . . ? 
F2 B1 F1 111.4(8) . . ? 
F3 B1 F1 107.9(9) . . ? 
F4 B1 F1 103.3(8) . . ? 
F6 B2 F8 113.9(13) . . ? 
F6 B2 F5 113.6(10) . . ? 
F8 B2 F5 111.0(7) . . ? 
F6 B2 F7 107.5(8) . . ? 
F8 B2 F7 107.0(10) . . ? 
F5 B2 F7 102.9(11) . . ? 
Cl1A C1S Cl1B 113.3(4) . . ? 
Cl2A C2S Cl2B 105.7(4) . . ? 
 
loop_ 
 _geom_hbond_atom_site_label_D 
 _geom_hbond_atom_site_label_H 
 _geom_hbond_atom_site_label_A 
 _geom_hbond_distance_DH 
 _geom_hbond_distance_HA 
 _geom_hbond_distance_DA 
 _geom_hbond_angle_DHA 
 _geom_hbond_site_symmetry_A 
O1W H1WA F1  0.85 1.64 2.487(8) 178.2 . 
O1W H1WB F5  0.85 1.80 2.589(7) 152.9 . 
O1W H1WC O1  0.85 1.90 2.700(8) 155.6 . 
 
_diffrn_measured_fraction_theta_max    0.999 
_diffrn_reflns_theta_full              25.00 
_diffrn_measured_fraction_theta_full   0.999 
_refine_diff_density_max    1.708 
_refine_diff_density_min   -1.022 
_refine_diff_density_rms    0.118 
